# Supplementary material for: The Synergistic Mechanism of Total Saponins and Flavonoids in Notoginseng–Safflower against Myocardial Infarction Using a Comprehensive Metabolomics Strategy
Source: MDPI journal article supplement (doi:10.3390/molecules27248860), 2022-12-13
Supplement: s1 [file s1]

Supporting information for:

**The synergistic mechanism of total saponins and flavonoids in  
Notoginseng-Safflower against myocardial infarction by a  
comprehensive metabolomics strategy**

Meng Fang<sup>1,†</sup>, Yu-Qing Meng<sup>1,†</sup>, Zhi-Yong Du<sup>1</sup>, Meng-Qiu Guo<sup>1</sup>, Yong Jiang<sup>1</sup>, Peng-Fei Tu<sup>1</sup>, Kun Hua<sup>2,\*</sup>,  
Ying-Yuan Lu<sup>1,\*</sup>, Xiao-Yu Guo<sup>1,\*</sup>

<sup>1</sup> State Key Laboratory of Natural and Biomimetic Drugs, School of Pharmaceutical Sciences, Peking University, Beijing 100191, China

<sup>2</sup> Department of Cardiovascular Surgery, Beijing Anzhen Hospital, Capital Medical University, Beijing 100029, China

\* Correspondence: kunhua@mail.ccmu.edu.cn (K.H.); luyingyuan518@bjmu.edu.cn (Y.Y.L.); guox-iaoyu@bjmu.edu.cn (X.Y.G.)

† These authors contributed equally to this study.

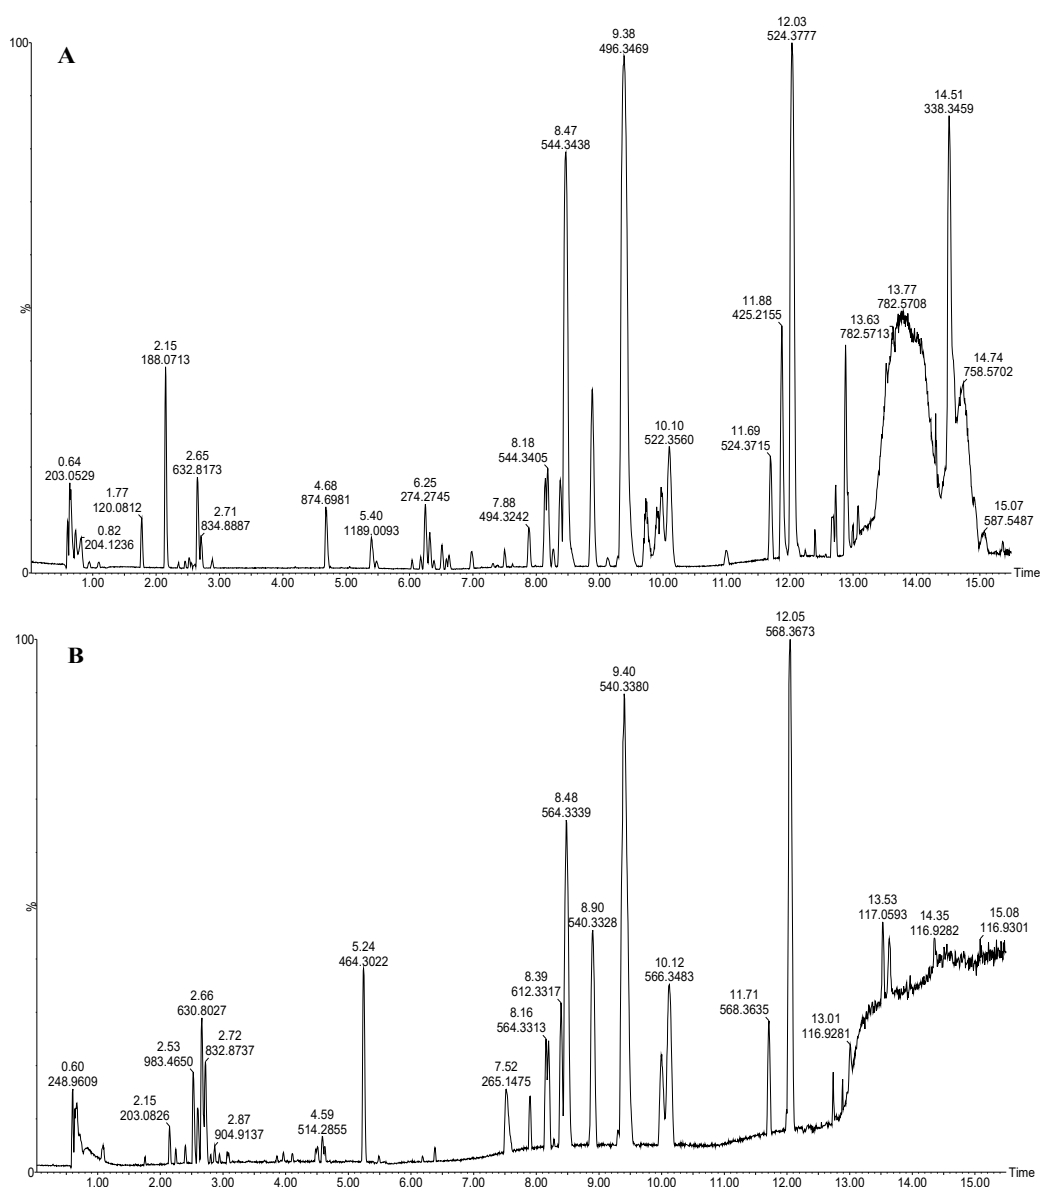

**Figure S1** The representative base peak intensity chromatograms of the rat plasma samples in ESI positive and negative mode by UPLC-QTOF/MS. A, positive mode; B, negative mode.

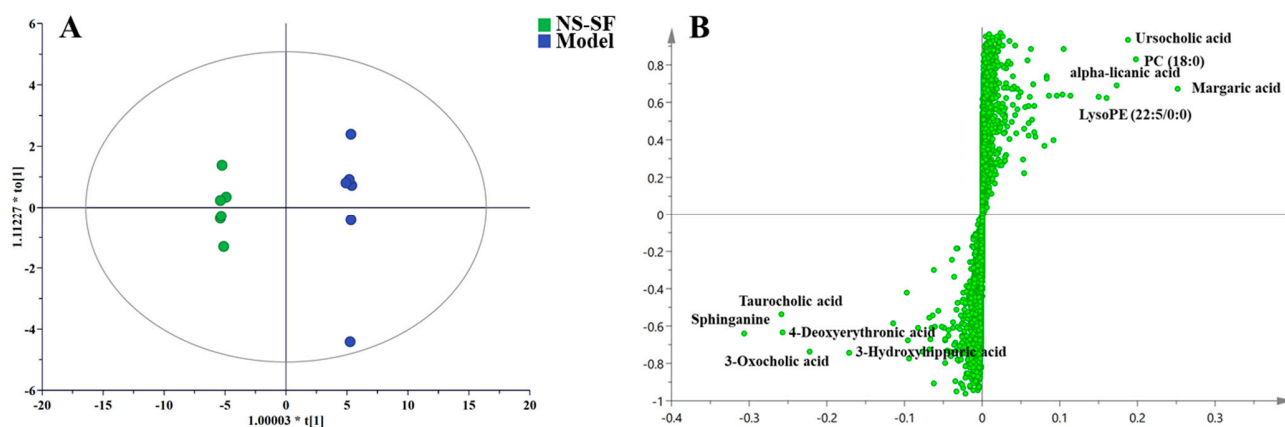

**Figure S2** The OPLS-DA analysis of the plasma samples from NS-SF and model rats by UPLC-QTOF/MS analysis. A, OPLS-DA score plot of plasma samples; B, S-plot from OPLS-DA of plasma samples.

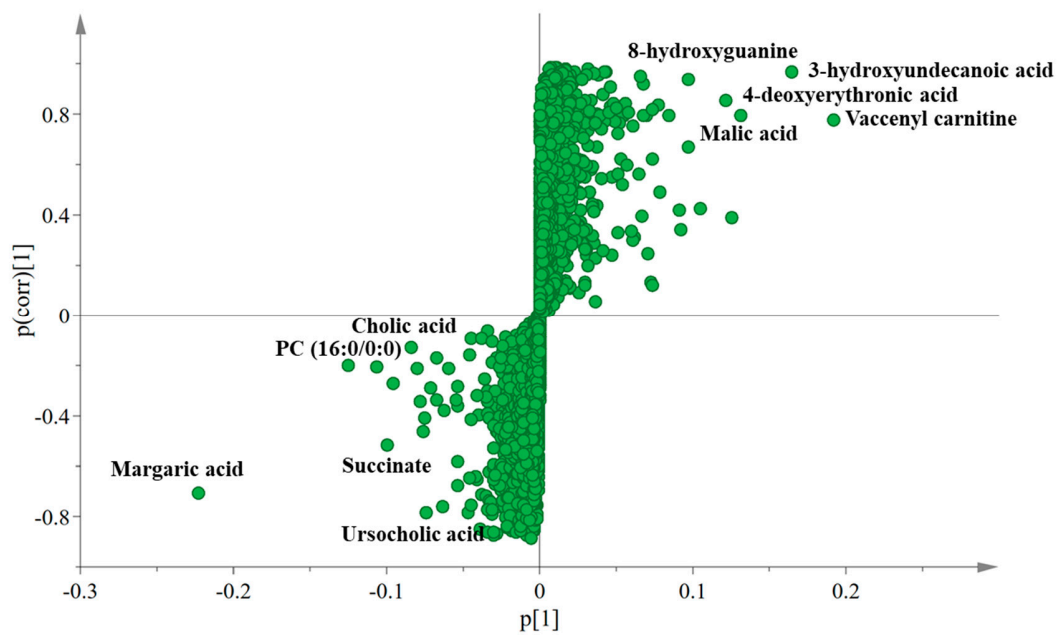

**Figure S3** S-plot of the plasma samples from sham and model rats by UPLC-QTOF/MS analysis.
